# Supplementary material for: Quantitative Phase Imaging Using Digital Holographic Microscopy to Assess the Degree of Intestinal Inflammation in Patients with Ulcerative Colitis
Source: MDPI journal article supplement (doi:10.3390/jcm12124067), 2023-06-15
Supplement: s1 [file s1]

**Figure S1:** Exemplary image for the determination of subepithelial ROIs.

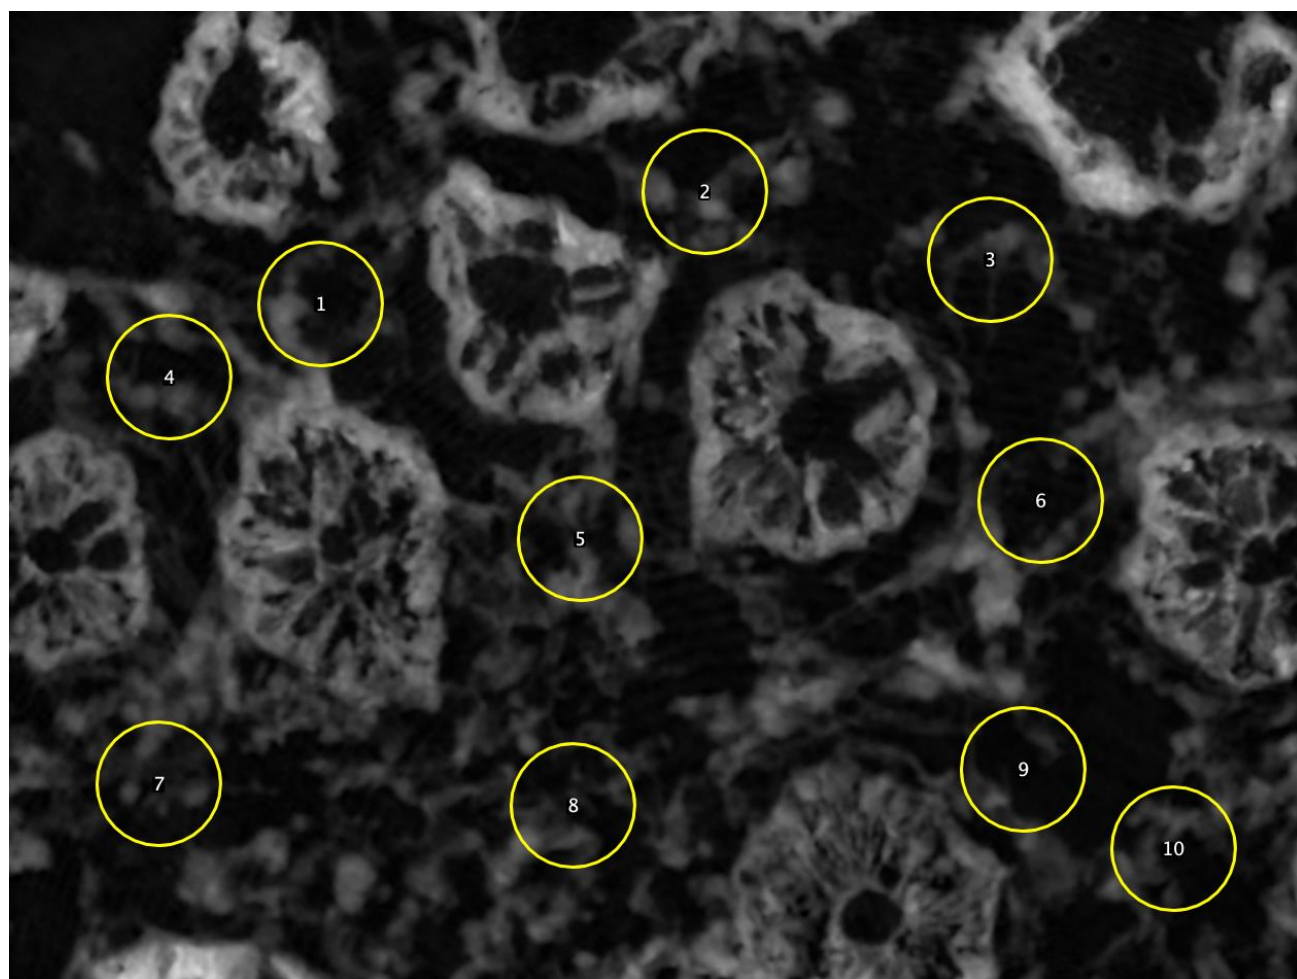

**Figure S2:** Significantly higher total Mayo score  $5.3 \pm 3.4$  (Mean  $\pm$  SEM) amongst UC patients with a RI  $> 1.3488$  in the most distal biopsy compared to a Mayo score of 1.9 (SEM  $\pm 3.3$ ) for those with a lower RI at the most distal biopsy site ( $p < 0.05$ ).

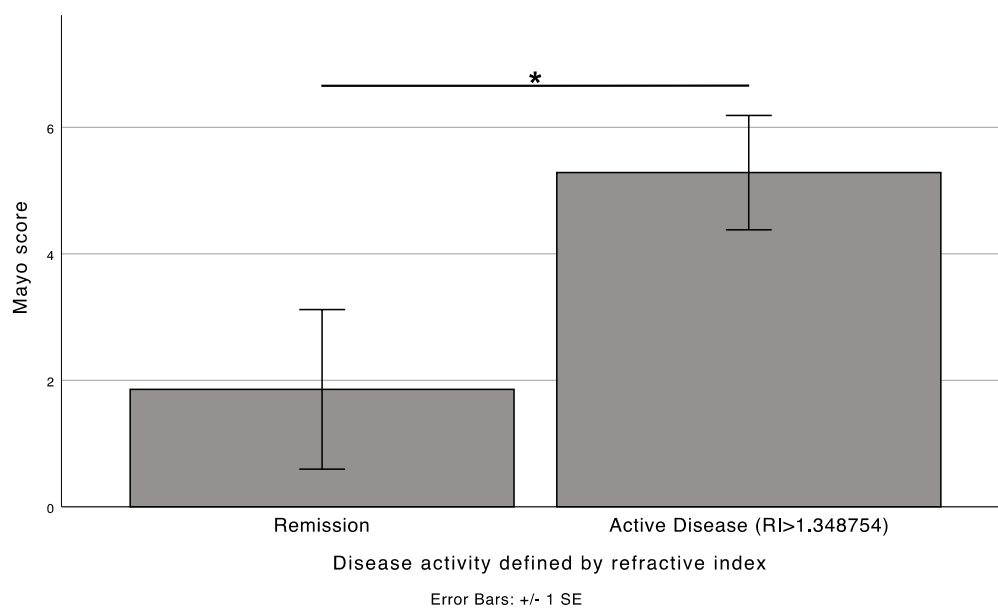

**Table S1:** Significant correlations between tissue refractive index as determined by digital holographic microscopy and multiple histopathological in 78 biopsies from patients with ulcerative colitis.

| Correlations     |                     |                  |             |        |        |        |                       |
|------------------|---------------------|------------------|-------------|--------|--------|--------|-----------------------|
|                  |                     | Refractive index | Nancy Index | GEBOES | RHI    | Riley  | Endoscopic Mayo-Score |
|                  | Pearson Correlation | 1                | .501**      | .482** | .468** | .472** | .419**                |
| Refractive index | Sig. (2-tailed)     |                  | <0.001      | <0.001 | <0.001 | <0.001 | <0.001                |
|                  | N                   | 78               | 78          | 78     | 78     | 78     | 78                    |

\*\* . Correlation is significant at the 0.01 level (2-tailed).

**Table S2:** Pearson correlations between tissue refractive index as determined by digital holographic microscopy at the most distal biopsy site (n=21) and clinical data/laboratory values.

### Correlations

|                              |                     | Refractive index |
|------------------------------|---------------------|------------------|
| Refractive index             | Pearson Correlation | 1                |
|                              | Sig. (2-tailed)     |                  |
|                              | N                   | 23               |
| CRP in mg/dl                 | Pearson Correlation | 0.121            |
|                              | Sig. (2-tailed)     | 0.613            |
|                              | N                   | 20               |
| Leukocytes in tsd/microl     | Pearson Correlation | 0.289            |
|                              | Sig. (2-tailed)     | 0.204            |
|                              | N                   | 21               |
| Thrombocytes in tsd/microl   | Pearson Correlation | 0.095            |
|                              | Sig. (2-tailed)     | 0.682            |
|                              | N                   | 21               |
| Faecal Calprotectin in mg/kg | Pearson Correlation | 0.470            |
|                              | Sig. (2-tailed)     | 0.424            |
|                              | N                   | 5                |
| Stool Frequency              | Pearson Correlation | 0.369            |
|                              | Sig. (2-tailed)     | 0.100            |
|                              | N                   | 21               |
| Rectal Bleeding              | Pearson Correlation | 0.143            |
|                              | Sig. (2-tailed)     | 0.537            |
|                              | N                   | 21               |
| Endoscopic score             | Pearson Correlation | 0.413            |
|                              | Sig. (2-tailed)     | 0.063            |
|                              | N                   | 21               |
| Physician Assessment         | Pearson Correlation | 0.417            |
|                              | Sig. (2-tailed)     | 0.060            |
|                              | N                   | 21               |
| Mayo score                   | Pearson Correlation | 0.378            |
|                              | Sig. (2-tailed)     | 0.091            |
|                              | N                   | 21               |

\*. Correlation is significant at the 0.05 level (2-tailed).

\*\*. Correlation is significant at the 0.01 level (2-tailed).
